# Supplementary material
Source: Springer Nature journal article supplement (https://www.springermedizin.de/resource/supplementary/12885_2010_2525_MOESM7_ESM.pdf/9462024)

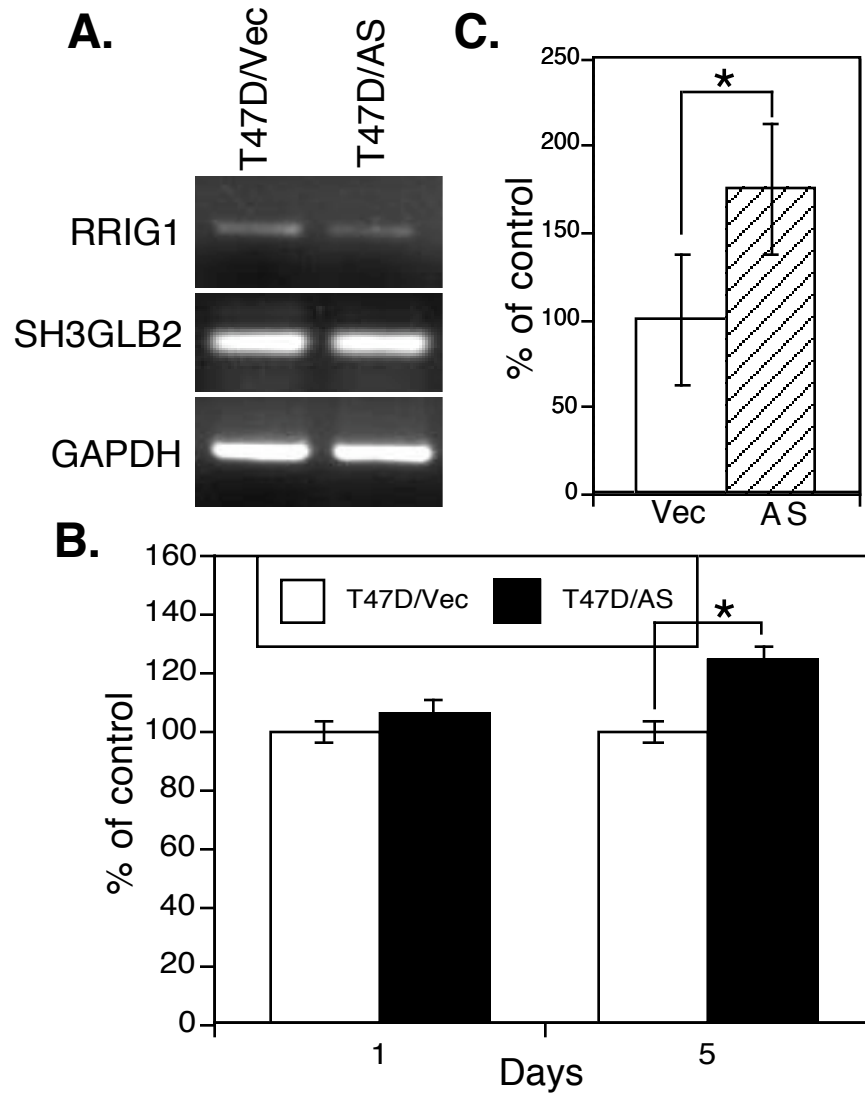

Fig. 6

Supplement: MOESM7 [file 9462024]
